# Supplementary material
Source: publisher figshare collection journal article supplement (https://tandf.figshare.com/ndownloader/files/21591894)
Supplement: Supplementary file 1 [file 21591894]

PsychInfo Search

1. exp "SUBSTANCE ABUSE AND ADDICTION MEASURES"/ or exp DRUG ADDICTION/ or exp ADDICTION/

2. exp Alcohol Abuse/

3. exp ALCOHOLISM/

4. alcohol dependence.mp. or exp Alcoholism/

5. exp Client Attitudes/ or exp Decision Making/ or exp "Clinical Judgment (Not Diagnosis)"/ or exp "Medical Treatment (General)"/ or medical decision making.mp.

6. shared decision making.mp.

7. exp Preferences/ or patient preference.mp.

8. patient participation.mp. or exp Client Participation/

9. treatment planning.mp. or exp Treatment Planning/

10. exp DRUG ABSTINENCE/ or abstinence.mp.

11. treatment outcome.mp. or exp Treatment Outcomes/

12. exp TREATMENT DROPOUTS/ or exp TREATMENT TERMINATION/ or exp TREATMENT OUTCOMES/ or exp TREATMENT COMPLIANCE/ or exp TREATMENT EFFECTIVENESS EVALUATION/

13. exp TREATMENT COMPLIANCE/ or exp COMPLIANCE/

14. adherence.mp.

15. quality of life.mp. or exp "Quality of Life"/

16. 1 or 2 or 3 or 4

17. 5 or 6 or 7 or 8 or 9

18. 10 or 11 or 12 or 13 or 14 or 15

19. decision making/ or informed choice.mp.

20. 17 or 19

21. 16 and 18 and 20

MEDLINE search

1. ALCOHOLISM/px, th [Psychology, Therapy]

2. Alcohol Drinking/ or Binge Drinking/ or Alcoholic Intoxication/ or Alcoholism/

3. Decision Making/

4. exp Patient Participation/px [Psychology]

5. Patient Participation/ or Patient-Centered Care/

6. exp Patient Satisfaction/ or exp Patient Preference/

7. 1 or 2

8. 3 or 4 or 5 or 6

9. 7 and 8

10. PSYCHOTHERAPY/

11. 9 and 10

PubMed search

((((((informed[All Fields] AND ("choice behavior"[MeSH Terms] OR ("choice"[All Fields] AND "behavior"[All Fields]) OR "choice behavior"[All Fields] OR "choice"[All Fields])) OR ("patient participation"[MeSH Terms] OR ("patient"[All Fields] AND "participation"[All Fields]) OR "patient participation"[All Fields])) OR ("decision making"[MeSH Terms] OR ("decision"[All Fields] AND "making"[All Fields]) OR "decision making"[All Fields] OR ("shared"[All Fields] AND "decision"[All Fields] AND "making"[All Fields]) OR "shared decision making"[All Fields])) OR ("patient preference"[MeSH Terms] OR ("patient"[All Fields] AND "preference"[All Fields]) OR "patient preference"[All Fields])) OR ("decision making"[MeSH Terms] OR ("decision"[All Fields] AND "making"[All Fields]) OR "decision making"[All Fields])) OR ("clinical decision-making"[MeSH Terms] OR ("clinical"[All Fields] AND "decision-making"[All Fields]) OR "clinical decision-making"[All Fields] OR ("medical"[All Fields] AND "decision"[All Fields] AND "making"[All Fields]) OR "medical decision making"[All Fields])) AND ((((((abstinence[All Fields] OR (("drinking"[MeSH Terms] OR "drinking"[All Fields] OR "alcohol drinking"[MeSH Terms] OR ("alcohol"[All Fields] AND "drinking"[All Fields]) OR "alcohol drinking"[All Fields]) AND days[All Fields])) OR ("quality of life"[MeSH Terms] OR ("quality"[All Fields] AND "life"[All Fields]) OR "quality of life"[All Fields])) OR ("patient compliance"[MeSH Terms] OR ("patient"[All Fields] AND "compliance"[All Fields]) OR "patient compliance"[All Fields] OR "compliance"[All Fields] OR "compliance"[MeSH Terms])) OR ("patient satisfaction"[MeSH Terms] OR ("patient"[All Fields] AND "satisfaction"[All Fields]) OR "patient satisfaction"[All Fields])) OR adherence[All Fields]) AND (((("behavior, addictive"[MeSH Terms] OR ("behavior"[All Fields] AND "addictive"[All Fields]) OR "addictive behavior"[All Fields] OR "addiction"[All Fields]) OR ("alcoholism"[MeSH Terms] OR "alcoholism"[All Fields] OR ("alcohol"[All Fields] AND "abuse"[All Fields]) OR "alcohol abuse"[All Fields])) OR ("alcoholism"[MeSH Terms] OR "alcoholism"[All Fields])) OR ("alcoholism"[MeSH Terms] OR "alcoholism"[All Fields] OR ("alcohol"[All Fields] AND "dependence"[All Fields]) OR "alcohol dependence"[All Fields])) NOT ((("rats"[MeSH Terms] OR "rats"[All Fields] OR "rat"[All Fields]) OR ("mice"[MeSH Terms] OR "mice"[All Fields])) OR ("mice"[MeSH Terms] OR "mice"[All Fields] OR "mouse"[All Fields])))
